# Supplementary material for: Redirection to the bone marrow improves T cell persistence and antitumor functions
Source: J Clin Invest. 2018 Apr 9;128(5):2010–24. doi: 10.1172/JCI97454 (PMC5919805; doi:10.1172/JCI97454)
Supplement: Supplemental data [file jci-128-97454-s001.pdf]

## Supplemental Data

Supplemental Figure 1 compares CXCR4 expression in untreated CD8<sup>+</sup> T cells, following activation with anti-CD3/CD28 beads and 3d following transduction. Supplemental Figure 2 shows the increase in local CXCL12 levels in the BM after irradiation. Supplemental Figure 3 shows staining of both endothelial and non-endothelial cells by Intravenous anti-CXCL12. Supplemental Figure 4 shows the competition profile of OT-I T<sup>CXCR4</sup> and T<sup>Control</sup> in peripheral blood over time. Supplemental Figure 5 shows the absolute numbers of CD62L<sup>high</sup> and CD62L<sup>low</sup> cells within Ag-activated OT-I T<sup>CXCR4</sup> and OT-I T<sup>Control</sup> populations. Supplemental Figure 6 shows greater retention of CD62L by OT-I T<sup>CXCR4</sup> following vaccination with peptide-pulsed DC given intravenously. Supplemental Figure 7 shows the proliferative response to antigen of OT-I T<sup>CXCR4</sup> and OT-I T<sup>Control</sup> following prime-boost vaccination. Supplemental Figure 8 shows the anti-tumor activity of B6-derived T<sup>CXCR4</sup> following syngeneic BMT. Supplemental Table 1, included in a separate Excel file, lists the differentially expressed genes between resting memory OT-I T<sup>CXCR4</sup> and OT-I T<sup>Control</sup>. Supplemental Table 2, included in a separate Excel file, lists the Reactome pathways enriched in resting memory OT-I T<sup>CXCR4</sup> and OT-I T<sup>Control</sup> by GSEA.

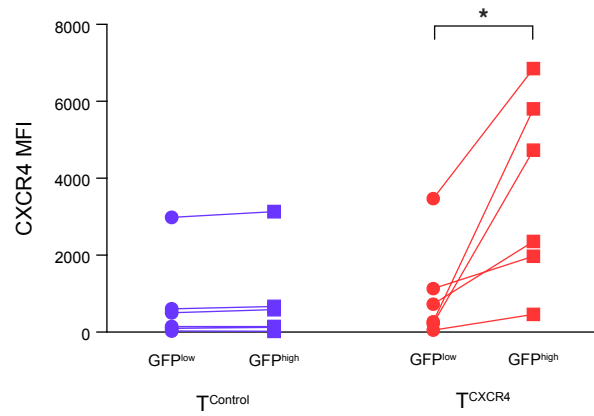

**Supplemental Figure 1: Summary data showing median fluorescence index (MFI) for CXCR4 expression in GFP<sup>-</sup> and GFP<sup>+</sup> cells 3d following transduction with control *Gfp* or *Cxcr4-Gfp* vectors.** Statistical comparison performed by the Wilcoxon signed rank test against a hypothetical ratio of 1.0 (indicated by the dotted line) \* $p \leq 0.05$ .

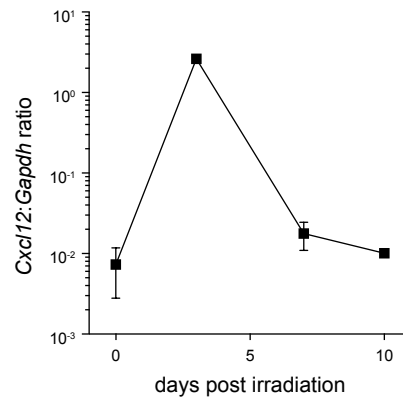

**Supplemental Figure 2: Irradiation increases local CXCL12 levels in the BM.** Quantitative RT-PCR was used to determine expression of *Cxcl12* mRNA at timed intervals following 5.5 Gy irradiation. Graph shows mean  $\pm$ SD *Cxcl12* mRNA in relation to a *Gapdh* loading control.

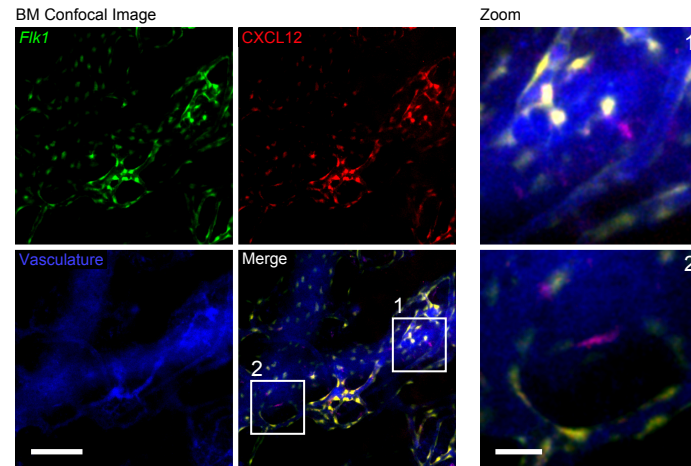

**Supplemental Figure 3: Intravenous anti-CXCL12 stains both endothelial and non-endothelial cells.** Intra-vital confocal calvarial imaging was performed on *Flk1-Gfp* reporter mice. Montage and high magnification insets are shown following intravenous injection of anti-CXCL12-PE (red) and Cy5-dextran to identify vasculature (blue). Yellow identifies endothelial staining of CXCL12 and purple identifies non-endothelial staining. Scale bars indicate 100  $\mu\text{m}$  (montage) and 20  $\mu\text{m}$  (high magnification).

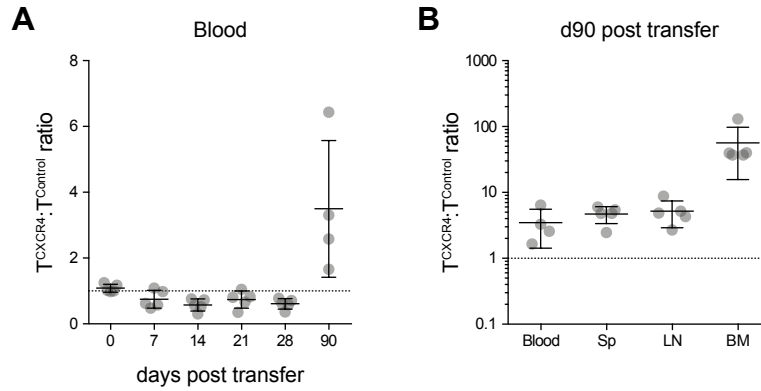

**Supplemental Figure 4: Competition of OT-I  $T^{CXCR4}$  and  $T^{Control}$  in peripheral blood.** Sub-lethally irradiated syngeneic B6 recipients received intravenous injection of equal mixtures of OT-I  $T^{CXCR4}$  and  $T^{Control}$  identifiable by distinct congenic markers and were then vaccinated by intra-peritoneal injection with BM-derived dendritic cells loaded with relevant peptide (SIINFEKL) followed by determination of relative numbers in peripheral blood at timed intervals. **(A)** Graph shows OT-I  $T^{CXCR4}$ :OT-I  $T^{Control}$  ratio at timed intervals in peripheral blood. Statistical comparison was performed by one sample t-test against a hypothetical ratio of 1.0 (indicated by the dotted line,  $p \leq 0.01$  at day 14 and day 28). **(B)** For comparison, graph shows OT-I  $T^{CXCR4}$ :OT-I  $T^{Control}$  ratio in peripheral blood, spleen, lymph node and BM at day 90 in the same experiment. Note y-axis has a log scale.

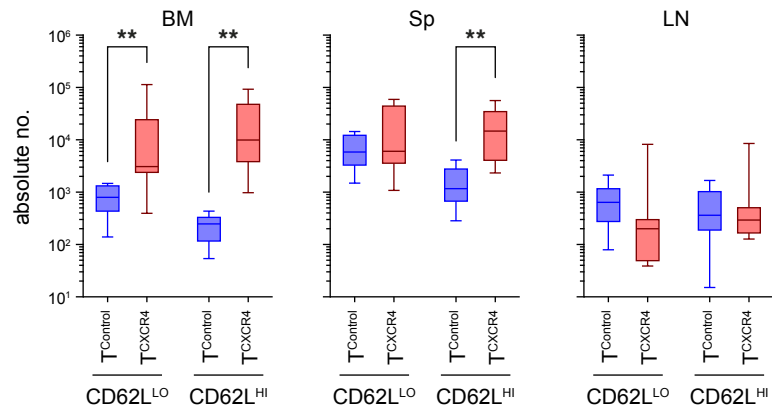

**Supplemental Figure 5: Absolute numbers of CD62L<sup>high</sup> and CD62L<sup>low</sup> cells within Ag-activated OT-I T<sup>CD4</sup> and OT-I T<sup>Control</sup> populations.** Equal numbers (5x10<sup>5</sup>) of OT-I T<sup>CD4</sup> and OT-I T<sup>Control</sup> were co-injected into *Rag1ko* mice, which then underwent prime-boost vaccination with relevant SIINFEKL peptide + IFA on days 1 and 29. Graphs shown are box and whisker graphs showing absolute numbers of CD62L<sup>high</sup> and CD62L<sup>low</sup> OT-I T<sup>Control</sup> and OT-I T<sup>CD4</sup> on day 36 (n=9, derived from 4 independent experiments). Statistical comparisons were made by Wilcoxon matched-pairs signed rank test \*\**p*≤0.01.

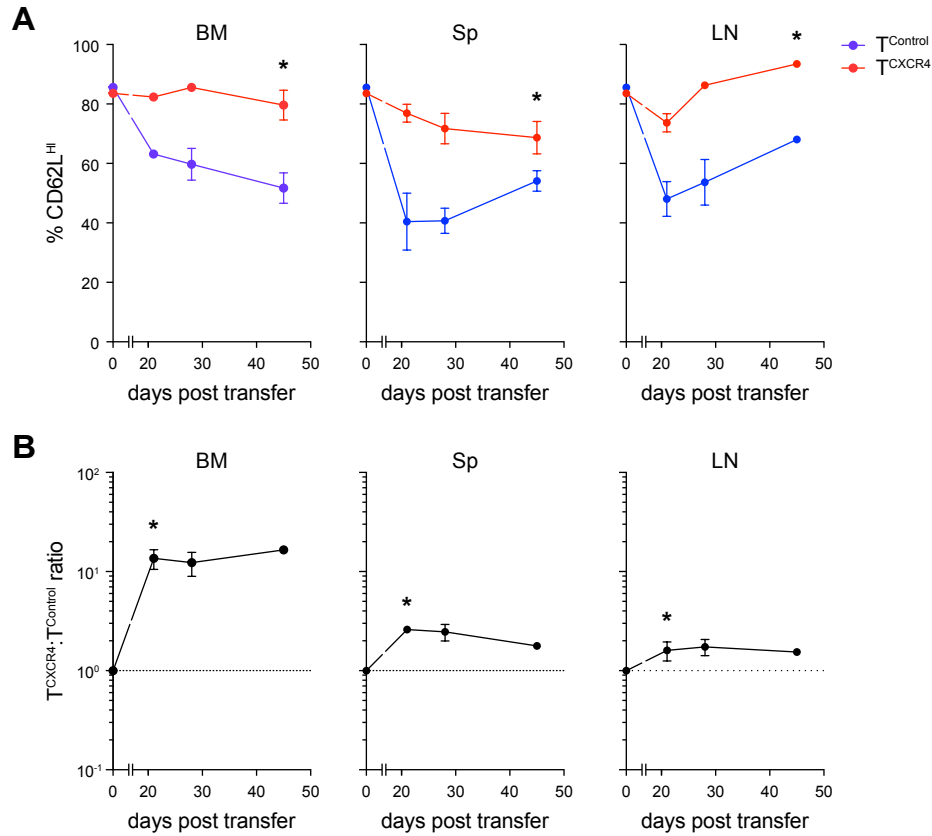

**Supplemental Figure 6: OT-I T<sup>CXCR4</sup> show greater retention of CD62L following vaccination with peptide-pulsed DC given intravenously.** (A) Equal mixtures of OT-I T<sup>CXCR4</sup> and T<sup>Control</sup> identifiable by distinct congenic markers were injected into sub-lethally irradiated syngeneic B6 recipients and vaccinated with mature CD11c<sup>+</sup> splenic DC loaded with relevant peptide (SIINFEKL) at 3 weeks followed by evaluation of the response. Summary data is shown for %CD62L<sup>+</sup> for OT-I T<sup>Control</sup> (blue circles) and OT-I T<sup>CXCR4</sup> (red circles) in BM, Sp and LN at timed intervals (n=5-6/time point). Statistical comparisons were made by Wilcoxon matched-pairs signed rank test. Error bars denote SD. \*p<0.05. (B) Summary graphs indicate mean  $\pm$ SD for OT-I T<sup>CXCR4</sup>:OT-I T<sup>Control</sup> ratio at timed intervals at each site. Data are pooled from two independent experiments (n=5-6/timepoint). Statistical comparison was performed by the Wilcoxon signed rank test against a hypothetical ratio of 1.0 (indicated by the dotted line) \*p<0.05.

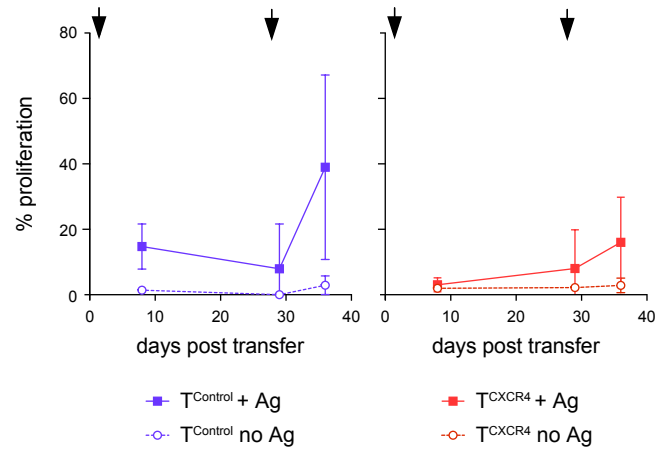

**Supplemental Figure 7: Proliferative response of OT-I T<sup>CXCR4</sup> to antigen is blunted following prime-boost vaccination.** Equal numbers ( $5 \times 10^5$ ) of OT-I T<sup>CXCR4</sup> (red) and OT-I T<sup>Control</sup> (blue) were co-injected into *Rag1ko* mice, which then underwent prime-boost vaccination with relevant SIINFEKL peptide + IFA on days 1 and 29. 5-ethynyl-2'-deoxyuridine was administered to mice by intra-peritoneal injection at timed intervals following vaccination and its incorporation evaluated 24h later. BM was harvested on day 8 (n=4/group), day 29 (n=3 Ag; n=1 no Ag) and day 36 (n=9 Ag; n=3 no Ag).

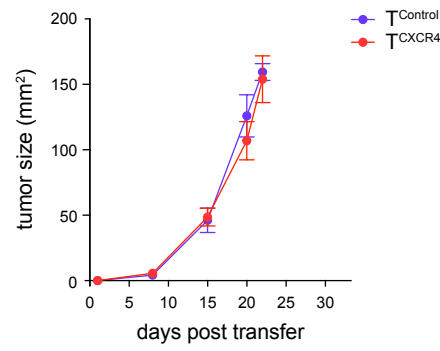

**Supplemental Figure 8: B6-derived T<sup>CXCR4</sup> do not demonstrate superior anti-tumor activity following syngeneic BMT.** Experimental design was adapted from Figure 7A with transduced T cells being transferred to B6→B6 syngeneic BMT recipients. X-y graph shows mean  $\pm$ SD A20 tumor size following transfer of CD8<sup>+</sup> T<sup>Control</sup> (blue) or T<sup>CXCR4</sup> (red).

**Supplemental Videos 1-4.** Intra-vital confocal calvarial imaging of transduced T cells (green) was performed 8 weeks post injection of T<sup>Control</sup> and T<sup>CXCR4</sup> into separate *Rag1ko* mice. Real time imaging was performed following intravenous injection of anti-CXCL12-PE (red) and Cy5-dextran to identify vasculature (blue). Data shown are videos representative of behaviour of T<sup>CXCR4</sup> (Videos 1 and 2) and T<sup>Control</sup> (Videos 3 and 4); all videos are 30 minutes in duration.

**Supplemental Table 1, included in a separate Excel file.** List of the differentially expressed genes between resting memory OT-I T<sup>CXCR4</sup> and OT-I T<sup>Control</sup> (absolute fold-change  $\geq 1.5$ ; ANOVA  $p$ -value  $\leq 0.01$ ).

**Supplemental Table 2, included in a separate Excel file.** List of Reactome pathways enriched in resting memory OT-I T<sup>CXCR4</sup> and OT-I T<sup>Control</sup> by GSEA.
